# Supplementary material for: Spatial Regulation of lag-2 Transcription During Vulval Precursor Cell Fate Patterning in Caenorhabditis elegans lag-2
Source: Oxford University Press journal article supplement (doi:10.1534/genetics.111.128389), 2011-05-20
Supplement: 128389_si.pdf [file 128389_si.pdf]

# GENETICS

Supporting Information

<http://www.genetics.org/content/suppl/2011/05/19/genetics.111.128389.DC1>

## **Spatial Regulation of *lag-2* Transcription During Vulval Precursor Cell Fate Patterning in *Caenorhabditis elegans***

Xinyong Zhang and Iva Greenwald

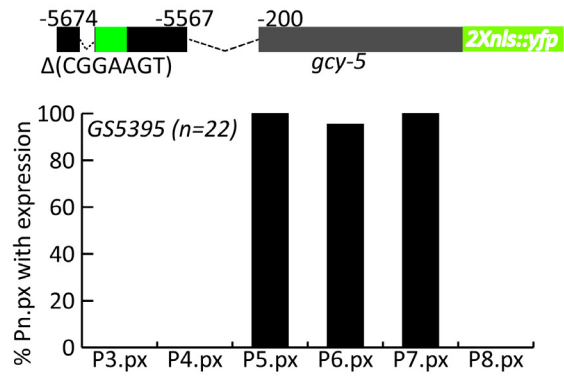

**Figure S1** Deletion of ELK1 motif in *lag-2* heterologous promoter (Fig. 2J) causes ectopic expression in all VPCs.

**Table S1 Primer sets used for fusion PCR**

| Strain        | Array           | Primer                                                                                                                                        |
|---------------|-----------------|-----------------------------------------------------------------------------------------------------------------------------------------------|
| <i>GS4229</i> | <i>arEx763</i>  | A=TGTCAGAATGTCCCATGTAGG                                                                                                                       |
| <i>GS4230</i> | <i>arEx764</i>  | B=AGTCGACCTGCAGGCATGCAAGCTGGCAAATTTGAAAAGTGTGTTG                                                                                              |
| <i>GS4892</i> | <i>arIs131</i>  | A*=GATTGATCTCCGTAAATGGC                                                                                                                       |
| <i>GS4276</i> | <i>arEx791</i>  | A=TTGATTATATCTCGGTTCAATTTGG<br>B=AGTCGACCTGCAGGCATGCAAGCTGGCAAATTTGAAAAGTGTGTTG                                                               |
| <i>GS4277</i> | <i>arEx792</i>  | A*=AACGGCCAACCTCTGATAGAGTAGG                                                                                                                  |
| <i>GS4251</i> | <i>arEx774</i>  | 5F=TGTCAGAATGTCCCATGTAGG<br>5R=CGAGCTTTTGGGGAATTTTAAAGACAATCGCAGATTTTCGGCAGTTGCA<br>3F=TCTTTAAAATTCCCCAAAAGCTCG)                              |
| <i>GS4254</i> | <i>arEx776</i>  | 3R=GACTGGGAGGCAGGTGAGGA<br>A=GATTGATCTCCGTAAATGGC                                                                                             |
| <i>GS4255</i> | <i>arEx777</i>  | B=AGTCGACCTGCAGGCATGCAAGCTGGCAAATTTGAAAAGTGTGTTG<br>A*= ATTCTAAACAGATTTTCGGATGG<br>5F=TATTTCAATCAAGTCTTGGTCAATA                               |
| <i>GS4458</i> | <i>arEx869</i>  | 5R=CGAGCTTTTGGGGAATTTTAAAGACAATCGCAGATTTTCGGCAGTTGCA<br>3F=TCTTTAAAATTCCCCAAAAGCTCG<br>3R=GACTGGGAGGCAGGTGAGGA<br>A=TCCTTGCATAATTATAGAGGCGATG |
| <i>GS4477</i> | <i>arEx870</i>  | B=AGTCGACCTGCAGGCATGCAAGCTGGCAAATTTGAAAAGTGTGTTG<br>A*= GGAAGGGAGGCGGAAGTGGTTGA<br>5F=CTCAGAATCATAACTCTGTAATATGTTGACACCTGCCCGCTCGCCTAAATC     |
| <i>GS4964</i> | <i>arEx1034</i> | 5R=CAATCGCAGATTTTCGGCAGTTGCA<br>3F=TGCAACTGCCGAAATCTGCGATTGCTCAAATAAATGTCCAGAAATTTAC                                                          |
| <i>GS4965</i> | <i>arEx1035</i> | 3R=AGTCGACCTGCAGGCATGCAAGCTGGCAAATTTGAAAAGTGTGTTG                                                                                             |

A=GGAAGGGAGGCGGAAGTGGTTGA

*GS5008*     *arEx1063*     B=AGTCGACCTGCAGGCATGCAAGCTGGCAAATTTGAAAAGTGTGTTG

A\*=GGAAGGGAGGCGGAAGTGGTTGA

*GS5067*     *arEx1085*     5F=CTCAGAATCATAACTCTGTAATATGTTGACACCTGCCCCGCTCGCCTAAATC

5R=CAATCGCAGATTCGGCAGTTGCA

3F=TGCAACTGCCGAAATCTGCGATTGGTAGATTTTTTCTCGCCGTTATG

*GS5068;*     *arEx1086*     3R=AGTCGACCTGCAGGCATGCAAGCTGGCAAATTTGAAAAGTGTGTTG

A=GGAAGGGAGGCGGAAGTGGTTGA

*GS5069*     *arEx1087*     B=AGTCGACCTGCAGGCATGCAAGCTGGCAAATTTGAAAAGTGTGTTG

A\*=GGAAGGGAGGCGGAAGTGGTTGA

---

**Table S2 Primer sets used for fusion PCR for p847 and p849**

| Plasmid | Primer set                                                      |
|---------|-----------------------------------------------------------------|
| P847    | 5F- <u>PstI</u> =GCATGCCTGCAGGGAAGGGAGGCGGAAGTGGTTGA            |
|         | 5R=TGACACCCACCCCGGGTGTGTCACTGATCAAGGAGACAAATATTTTCGGTGAGAGTTTCA |
|         | 3F=TGAAAACCTCACCGAAAATATTTGGTAGATTTTTTCTCGCCGTTATG              |
|         | 3R- <u>KpnI</u> =GAGCTCGGTACCCGGGTTTCTGAAAAAAGGCAAATTTGAAAAGT   |
| P849    | 5F- <u>PstI</u> =GCATGCCTGCAGGGAAGGGAGGCGGAAGTGGTTGA            |
|         | 5R=TGAAAACCTCACCGAAAATATTTGGCAGATACCAACAAGATTA AAAAC            |
|         | 3F=GCAGATACCAACAAGATTA AAAAC                                    |
|         | 3R- <u>KpnI</u> =GAGCTCGGTACCCGGGTTTTCATCAGAATAAGTAATTTTTCG     |

**Table S3 Plasmids and arrays derived using PCR product from the plasmids**

| Plasmid | Promoter in the plasmid                                     | Strains (Array)                                                                                                                                                                                      |
|---------|-------------------------------------------------------------|------------------------------------------------------------------------------------------------------------------------------------------------------------------------------------------------------|
| p847    | <i>lag-2p(min)</i>                                          | <i>GS5095(arEx1097)</i> , <i>GS5096(arEx1098)</i> ,<br><i>GS5097(arEx1099)</i>                                                                                                                       |
| p851    | <i>lag-2p(min)Δ(-5655...-5636)<sup>a</sup></i>              | <i>GS5443(arEx1227)</i> , <i>GS5444(arEx1228)</i>                                                                                                                                                    |
| p852    | <i>lag-2p(min)Δ(-5645...-5626)<sup>a</sup></i>              | <i>GS5560(arEx1275)</i> , <i>GS5561(arEx1276)</i>                                                                                                                                                    |
| p853    | <i>lag-2p(min)Δ(-5635...-5616)<sup>a</sup></i>              | <i>GS5353(arEx1176)</i> , <i>GS5354(arEx1177)</i>                                                                                                                                                    |
| p854    | <i>lag-2p(min)Δ(-5625...-5606)<sup>a</sup></i>              | <i>GS5355(arEx1178)</i> , <i>GS5365(arEx1179)</i> ,<br><i>GS5366(arEx1180)</i>                                                                                                                       |
| p855    | <i>lag-2p(min)Δ(-5615...-5596)<sup>a</sup></i>              | <i>GS5548(arEx1263)</i> , <i>GS5549(arEx1264)</i> ,<br><i>GS5550(arEx1265)</i> , <i>GS5551(arEx1266)</i>                                                                                             |
| p856    | <i>lag-2p(min)Δ(-5605...-5586)<sup>a</sup></i>              | <i>GS5557(arEx1272)</i> , <i>GS5559(arEx1279)</i>                                                                                                                                                    |
| p857    | <i>lag-2p(min)Δ(-5595...-5576)<sup>a</sup></i>              | <i>GS5552(arEx1267)</i> , <i>GS5553(arEx1268)</i>                                                                                                                                                    |
| p858    | <i>lag-2p(min)Δ(-5585...-5567)<sup>a</sup></i>              | <i>GS5554(arEx1269)</i> , <i>GS5555(arEx1270)</i> ,<br><i>GS5556(arEx1271)</i>                                                                                                                       |
| p860    | <i>lag-2p(min)(C to A at -5648 and<br/>T to A at -5644)</i> | <i>GS5845(arEx1357)</i> , <i>GS5846 arEx1358)</i> ,<br><i>GS5847(arEx1359)</i> , <i>GS5848 arEx1360)</i>                                                                                             |
| p861    | <i>lag-2p(min)ΔVPCrep</i>                                   | <i>GS5425(arEx1213)</i> , <i>GS5426(arEx1214)</i> ,<br><i>GS5427(arEx1215)</i>                                                                                                                       |
| p849    | <i>lag-2p(-5674...-5567) + gcy-5p(-200...-1)</i>            | <i>GS5391(arEx1192)</i> , <i>GS5393(arEx1193)</i> ,<br><i>GS5394(arEx1194)</i><br><i>GS5431(arEx1218)<sup>b</sup></i> , <i>GS5432(arEx1219)<sup>b</sup></i> ,<br><i>GS5433(arEx1220)<sup>b</sup></i> |

<sup>a</sup> A *Bam*HI site(GGATCC) was inserted at the position of deletion.

<sup>b</sup>Strains were made using PCR product containing only *gcy-5p(-200...-1)::2Xnls-yfp*
