# Supplementary material for: Spatial Regulation of lag-2 Transcription During Vulval Precursor Cell Fate Patterning in Caenorhabditis elegans lag-2
Source: Oxford University Press journal article supplement (doi:10.1534/genetics.111.128389), 2011-05-20
Supplement: figures1.pdf [file figures1.pdf]

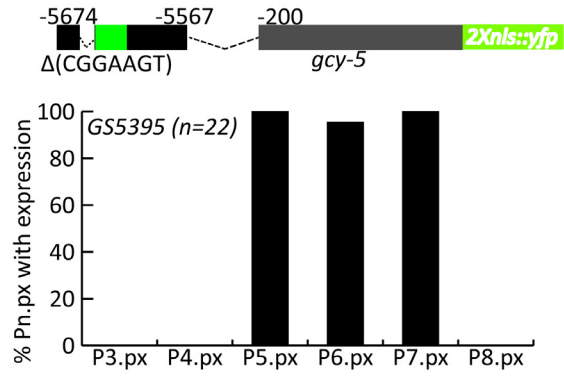

**Figure S1** Deletion of ELK1 motif in *lag-2* heterologous promoter (Fig. 2J) causes ectopic expression in all VPCs.
