# Supplementary material for: Spatial Regulation of lag-2 Transcription During Vulval Precursor Cell Fate Patterning in Caenorhabditis elegans lag-2
Source: Oxford University Press journal article supplement (doi:10.1534/genetics.111.128389), 2011-05-20
Supplement: tables1.pdf [file tables1.pdf]

**Table S1 Primer sets used for fusion PCR**

| Strain        | Array           | Primer                                                                                                                                        |
|---------------|-----------------|-----------------------------------------------------------------------------------------------------------------------------------------------|
| <i>GS4229</i> | <i>arEx763</i>  | A=TGTCAGAATGTCCCATGTAGG                                                                                                                       |
| <i>GS4230</i> | <i>arEx764</i>  | B=AGTCGACCTGCAGGCATGCAAGCTGGCAAATTTGAAAAGTGTGTTG                                                                                              |
| <i>GS4892</i> | <i>arIs131</i>  | A*=GATTGATCTCCGTAAATGGC                                                                                                                       |
| <i>GS4276</i> | <i>arEx791</i>  | A=TTGATTATATCTCGGTTCAATTTGG<br>B=AGTCGACCTGCAGGCATGCAAGCTGGCAAATTTGAAAAGTGTGTTG                                                               |
| <i>GS4277</i> | <i>arEx792</i>  | A*=AACGGCCAACCTCTGATAGAGTAGG                                                                                                                  |
| <i>GS4251</i> | <i>arEx774</i>  | 5F=TGTCAGAATGTCCCATGTAGG<br>5R=CGAGCTTTTGGGGAATTTTAAAGACAATCGCAGATTTCCGGCAGTTGCA<br>3F=TCTTTAAAATTCCCCAAAAGCTCG)                              |
| <i>GS4254</i> | <i>arEx776</i>  | 3R=GACTGGGAGGCAGGTGAGGA<br>A=GATTGATCTCCGTAAATGGC                                                                                             |
| <i>GS4255</i> | <i>arEx777</i>  | B=AGTCGACCTGCAGGCATGCAAGCTGGCAAATTTGAAAAGTGTGTTG<br>A*= ATTCTAAACAGATTTCCGGATGG<br>5F=TATTTCAATCAAGTCTTGGTCAATA                               |
| <i>GS4458</i> | <i>arEx869</i>  | 5R=CGAGCTTTTGGGGAATTTTAAAGACAATCGCAGATTTCCGGCAGTTGCA<br>3F=TCTTTAAAATTCCCCAAAAGCTCG<br>3R=GACTGGGAGGCAGGTGAGGA<br>A=TCCTTGCATAATTATAGAGGCGATG |
| <i>GS4477</i> | <i>arEx870</i>  | B=AGTCGACCTGCAGGCATGCAAGCTGGCAAATTTGAAAAGTGTGTTG<br>A*= GGAAGGGAGGCGGAAGTGGTTGA<br>5F=CTCAGAATCATAACTCTGTAATATGTTGACACCTGCCCGCTCGCCTAAATC     |
| <i>GS4964</i> | <i>arEx1034</i> | 5R=CAATCGCAGATTTCCGGCAGTTGCA<br>3F=TGCAACTGCCGAAATCTGCGATTGCTCAAATAAATGTCCCAGAATTTAC                                                          |
| <i>GS4965</i> | <i>arEx1035</i> | 3R=AGTCGACCTGCAGGCATGCAAGCTGGCAAATTTGAAAAGTGTGTTG                                                                                             |

A=GGAAGGGAGGCGGAAGTGGTTGA

*GS5008*     *arEx1063*     B=AGTCGACCTGCAGGCATGCAAGCTGGCAAATTTGAAAAGTGTGTTG

A\*=GGAAGGGAGGCGGAAGTGGTTGA

5F=CTCAGAATCATAACTCTGTAATATGTTGACACCTGCCCCGCTCGCCTAAATC

*GS5067*     *arEx1085*     5R=CAATCGCAGATTCGGCAGTTGCA

3F=TGCAACTGCCGAAATCTGCGATTGGTAGATTTTTTCTCGCCGTTATG

*GS5068;*     *arEx1086*     3R=AGTCGACCTGCAGGCATGCAAGCTGGCAAATTTGAAAAGTGTGTTG

A=GGAAGGGAGGCGGAAGTGGTTGA

B=AGTCGACCTGCAGGCATGCAAGCTGGCAAATTTGAAAAGTGTGTTG

*GS5069*     *arEx1087*     A\*=GGAAGGGAGGCGGAAGTGGTTGA

---
