# Supplementary material for: Spatial Regulation of lag-2 Transcription During Vulval Precursor Cell Fate Patterning in Caenorhabditis elegans lag-2
Source: Oxford University Press journal article supplement (doi:10.1534/genetics.111.128389), 2011-05-20
Supplement: tables2.pdf [file tables2.pdf]

**Table S2 Primer sets used for fusion PCR for p847 and p849**

| Plasmid | Primer set                                                      |
|---------|-----------------------------------------------------------------|
| P847    | 5F- <u>PstI</u> =GCATGCCTGCAGGGAAGGGAGGCGGAAGTGGTTGA            |
|         | 5R=TGACACCCACCCCGGGTGTGTCACTGATCAAGGAGACAAATATTTTCGGTGAGAGTTTCA |
|         | 3F=TGAAAACCTCACCGAAAATATTTGGTAGATTTTTTCTCGCCGTTATG              |
|         | 3R- <u>KpnI</u> =GAGCTCGGTACCCGGGTTTCTGAAAAAAGGCAAATTTGAAAAGT   |
| P849    | 5F- <u>PstI</u> =GCATGCCTGCAGGGAAGGGAGGCGGAAGTGGTTGA            |
|         | 5R=TGAAAACCTCACCGAAAATATTTGGCAGATACCAACAAGATTA AAAAC            |
|         | 3F=GCAGATACCAACAAGATTA AAAAC                                    |
|         | 3R- <u>KpnI</u> =GAGCTCGGTACCCGGGTTTTCATCAGAATAAGTAATTTTTCG     |
