# Supplementary material for: Spatial Regulation of lag-2 Transcription During Vulval Precursor Cell Fate Patterning in Caenorhabditis elegans lag-2
Source: Oxford University Press journal article supplement (doi:10.1534/genetics.111.128389), 2011-05-20
Supplement: tables3.pdf [file tables3.pdf]

**Table S3 Plasmids and arrays derived using PCR product from the plasmids**

| Plasmid | Promoter in the plasmid                                     | Strains (Array)                                                                                                                                                                                      |
|---------|-------------------------------------------------------------|------------------------------------------------------------------------------------------------------------------------------------------------------------------------------------------------------|
| p847    | <i>lag-2p(min)</i>                                          | <i>GS5095(arEx1097)</i> , <i>GS5096(arEx1098)</i> ,<br><i>GS5097(arEx1099)</i>                                                                                                                       |
| p851    | <i>lag-2p(min)Δ(-5655...-5636)<sup>a</sup></i>              | <i>GS5443(arEx1227)</i> , <i>GS5444(arEx1228)</i>                                                                                                                                                    |
| p852    | <i>lag-2p(min)Δ(-5645...-5626)<sup>a</sup></i>              | <i>GS5560(arEx1275)</i> , <i>GS5561(arEx1276)</i>                                                                                                                                                    |
| p853    | <i>lag-2p(min)Δ(-5635...-5616)<sup>a</sup></i>              | <i>GS5353(arEx1176)</i> , <i>GS5354(arEx1177)</i>                                                                                                                                                    |
| p854    | <i>lag-2p(min)Δ(-5625...-5606)<sup>a</sup></i>              | <i>GS5355(arEx1178)</i> , <i>GS5365(arEx1179)</i> ,<br><i>GS5366(arEx1180)</i>                                                                                                                       |
| p855    | <i>lag-2p(min)Δ(-5615...-5596)<sup>a</sup></i>              | <i>GS5548(arEx1263)</i> , <i>GS5549(arEx1264)</i> ,<br><i>GS5550(arEx1265)</i> , <i>GS5551(arEx1266)</i>                                                                                             |
| p856    | <i>lag-2p(min)Δ(-5605...-5586)<sup>a</sup></i>              | <i>GS5557(arEx1272)</i> , <i>GS5559(arEx1279)</i>                                                                                                                                                    |
| p857    | <i>lag-2p(min)Δ(-5595...-5576)<sup>a</sup></i>              | <i>GS5552(arEx1267)</i> , <i>GS5553(arEx1268)</i>                                                                                                                                                    |
| p858    | <i>lag-2p(min)Δ(-5585...-5567)<sup>a</sup></i>              | <i>GS5554(arEx1269)</i> , <i>GS5555(arEx1270)</i> ,<br><i>GS5556(arEx1271)</i>                                                                                                                       |
| p860    | <i>lag-2p(min)(C to A at -5648 and<br/>T to A at -5644)</i> | <i>GS5845(arEx1357)</i> , <i>GS5846 arEx1358)</i> ,<br><i>GS5847(arEx1359)</i> , <i>GS5848 arEx1360)</i>                                                                                             |
| p861    | <i>lag-2p(min)ΔVPCrep</i>                                   | <i>GS5425(arEx1213)</i> , <i>GS5426(arEx1214)</i> ,<br><i>GS5427(arEx1215)</i>                                                                                                                       |
| p849    | <i>lag-2p(-5674...-5567) + gcy-5p(-200...-1)</i>            | <i>GS5391(arEx1192)</i> , <i>GS5393(arEx1193)</i> ,<br><i>GS5394(arEx1194)</i><br><i>GS5431(arEx1218)<sup>b</sup></i> , <i>GS5432(arEx1219)<sup>b</sup></i> ,<br><i>GS5433(arEx1220)<sup>b</sup></i> |

<sup>a</sup> A *Bam*HI site(GGATCC) was inserted at the position of deletion.

<sup>b</sup>Strains were made using PCR product containing only *gcy-5p(-200...-1)::2Xnls-yfp*
